# Supplementary material for: SEAMUS (v1.0): a Δ 14 C-enabled, single-specimen sediment accumulation simulator
Source: Copernicus journal article supplement (doi:10.5194/gmd-2019-155), 2019-07-16
Supplement: Supplementary file 1 [file gmd-2019-155-supplement.pdf]

Table S1. Description of input parameters for *seamus\_run*

| <u>Required input</u>       | <u>Input type</u> | <u>Description</u>                                                                                                                                                                                                                                                                            | <u>Default value</u>         |
|-----------------------------|-------------------|-----------------------------------------------------------------------------------------------------------------------------------------------------------------------------------------------------------------------------------------------------------------------------------------------|------------------------------|
| simstart                    | integer           | Year of simulation start, years before 1950                                                                                                                                                                                                                                                   | n/a                          |
| siminc                      | integer           | Simulation timestep, years.                                                                                                                                                                                                                                                                   | n/a                          |
| simend                      | integer           | Year of simulation end, years before 1950                                                                                                                                                                                                                                                     | n/a                          |
| btinc                       | integer           | Bioturbation timestep, years.                                                                                                                                                                                                                                                                 | n/a                          |
| fpcm                        | integer           | Specimens (all species) per centimetre of core.                                                                                                                                                                                                                                               | n/a                          |
| realD14C                    | 1 or 0            | Include 'real' <sup>14</sup> C activity from calibration curve or simply calculate approximate <sup>14</sup> C activity according to half-life of <sup>14</sup> C. Value of 1 (Yes/Real) or 0 (No/Approximate).                                                                               | n/a                          |
| blankbg                     | integer           | <sup>14</sup> C blank value (in <sup>14</sup> C yr BP) for single specimens, i.e. that maximum <sup>14</sup> C age that any single specimens in the simulation can have.                                                                                                                      |                              |
| adpoints                    | m by 2 matrix     | Age-depth relationship of sediment core, where column 1 is age (in ka) and column 2 is core depth (cm). At least two age-depth points are required. Simulation will interpolate/extrapolate when assigning values for specific timesteps.                                                     | n/a                          |
| bdpoints                    | m by 2 matrix     | Temporal change in bioturbation depth. An n by 2 matrix, where column 1 is age (in ka) and column 2 is bioturbation depth (in cm). Simulation will interpolate/extrapolate when assigning values for specific timesteps.                                                                      | n/a                          |
| savename                    | string            | Save the output variables of the simulation to .mat file with this name.                                                                                                                                                                                                                      | n/a                          |
| <u>Optional input calls</u> |                   |                                                                                                                                                                                                                                                                                               |                              |
| 'calcurve', string          | string            | The calibration curve to use to assign <sup>14</sup> C activities to single specimens. Must be in the standard IntCal .14c file format and be present in your Matlab search path (or, alternatively, include the file path in the string). A number of files are already bundled with SEAMUS. | 'Marine13'                   |
| 'speciesA', matrix          | m by 2 matrix     | Temporal abundance of Species A, where column 1 is age (in ka) and column 2 is abundance (a value between 0 and 1, indicating the fraction of the total sediment flux per timestep). Simulation will interpolate/extrapolate when assigning values for specific timesteps.                    | Constant abundance of 1      |
| 'speciesB', matrix          | m by 2 matrix     | As above, but for Species B. The sum of the fractions of Species A and Species B must be less than or equal to 1 for any given timestep.                                                                                                                                                      | Constant abundance of 0      |
| 'resageA', matrix           | m by 2 matrix     | Reservoir age of Species A, where column 1 is age (in ka) and column 2 is reservoir age (in <sup>14</sup> C yr). Simulation will interpolate/extrapolate when assigning values for specific timesteps.                                                                                        | Constant reservoir age of 0. |
| 'resageB', matrix           | m by 2 matrix     | As above, but for Species B.                                                                                                                                                                                                                                                                  | Constant reservoir age of 0. |
| 'offsetA', matrix           | m by 2 matrix     | Cal age offset of Species A when assigning <sup>14</sup> C activity, where column 1 is age (in ka) and column 2 is cal age offset (in years). Simulation will interpolate/extrapolate when assigning values for specific timesteps.                                                           | Constant offset of 0.        |
| 'offsetB', matrix           | m by 2 matrix     | As above, but for Species B.                                                                                                                                                                                                                                                                  | Constant offset of 0.        |
| 'carrierA', matrix          | m by n matrix     | Desired carrier signals for Species A, where column 1 is age (in ka), column 1+x is the x <sup>th</sup> carrier signal, etc. Simulation will interpolate when assigning values for specific timesteps, but not extrapolate.                                                                   | none                         |
| 'carrierB', matrix          | m by n matrix     | As above, but for Species B.                                                                                                                                                                                                                                                                  | none                         |
| 'do32bit', integer          | 1 or 0            | Store arrays as 32-bit to save memory. 1 for yes, 0 for no.                                                                                                                                                                                                                                   | 0                            |

Table S2. Output variables (all of the same length) from *seamus\_run*

| <u>Output variable</u> | <u>Output type</u> | <u>Description</u>                                                                                                                                                                                                               |
|------------------------|--------------------|----------------------------------------------------------------------------------------------------------------------------------------------------------------------------------------------------------------------------------|
| depths                 | m by 1 matrix      | Depth values for each unique single foraminifer (in cm).                                                                                                                                                                         |
| depths_original        | m by 1 matrix      | Original depth values (non-bioturbated) for each unique single foraminifer.                                                                                                                                                      |
| cycles                 | m by 1 matrix      | Number of bioturbation cycles for each unique single foraminifer.                                                                                                                                                                |
| types                  | m by 1 matrix      | Species type of each unique single foraminifer (0 = Species A, 1 = Species B)                                                                                                                                                    |
| ages                   | m by 1 matrix      | True age for each unique single foraminifer (in years before 1950).                                                                                                                                                              |
| foram14c               | m by 1 matrix      | <sup>14</sup> C age for each unique single foraminifer.                                                                                                                                                                          |
| foramfmc               | m by 1 matrix      | <sup>14</sup> C activity, in fMC, for each unique single foraminifer.                                                                                                                                                            |
| carrierA               | m by n matrix      | Species A carrier signal value for each unique foraminifer (each column is a unique carrier). Tip: To isolate the carrierA signals associated with Species A specimens, use logical indexing: <code>carrierA(types==0, :)</code> |
| carrierB               | m by n matrix      | Species B carrier signal value for each unique foraminifer (each column is a unique carrier). Tip: To isolate the carrierB signals associated with Species B specimens, use logical indexing: <code>carrierB(types==1, :)</code> |

Table S3. Input variables for *seamus\_pick*

| <u>Required input</u>              | <u>Input type</u> | <u>Description</u>                                                                                                                                                                                                                                                                                                                                                                             | <u>Default value</u>           |
|------------------------------------|-------------------|------------------------------------------------------------------------------------------------------------------------------------------------------------------------------------------------------------------------------------------------------------------------------------------------------------------------------------------------------------------------------------------------|--------------------------------|
| matfilein                          | string            | String denoting the location of the .mat file generated by <i>seamus_run</i>                                                                                                                                                                                                                                                                                                                   |                                |
| matfileout                         | string            | Save the output of <i>seamus_pick</i> to a .mat file of this name.                                                                                                                                                                                                                                                                                                                             |                                |
| Apickfordate                       | integer           | Minimum number of whole Species A specimens to randomly pick for discrete depth samples (enter -1 to pick all available).                                                                                                                                                                                                                                                                      |                                |
| Bpickfordate                       | integer           | As above, but for Species B.                                                                                                                                                                                                                                                                                                                                                                   |                                |
| calcurve                           | string            | The calibration curve file to apply when <sup>14</sup> C calibrating the picked samples (e.g., 'Marine13'). The file must be present in the MatLab search path and conform to the IntCal '.14c' file format. A number of files are already bundled with SEAMUS.                                                                                                                                |                                |
| pickint                            | integer           | The discrete depth interval (core slice) size to apply when picking (in cm).                                                                                                                                                                                                                                                                                                                   |                                |
| <b><u>Optional input calls</u></b> |                   |                                                                                                                                                                                                                                                                                                                                                                                                |                                |
| 'Aresage', matrix                  | m by 3 matrix     | Reservoir age to apply to downcore picked samples of Species A, where column 1 is depth (cm), column 2 is reservoir age (in <sup>14</sup> C years) column 3 is reservoir age uncertainty (in <sup>14</sup> C years). Simulation will interpolate/extrapolate when assigning values for specific core depths.                                                                                   | Constant reservoir age of 0.   |
| 'Bresage', matrix                  | m by 3 matrix     | As above, but for Species B.                                                                                                                                                                                                                                                                                                                                                                   |                                |
| 'Abroken', matrix                  | m by 2 matrix     | The fraction of broken specimens (excluded from the picking process) for subsamples from Species A. Column 1 is depth (cm) and column 2 is fraction broken (between 0 and 1). The corresponding fraction of the specimens with the highest number of bioturbation cycles will be considered as broken. Simulation will interpolate/extrapolate when assigning values for specific core depths. | Constant fraction broken of 0. |
| 'Bbroken', matrix                  | m by 2 matrix     | As above, but for Species B.                                                                                                                                                                                                                                                                                                                                                                   |                                |

Table S4. Output variables (all of the same length) from *seamus\_pick*

| <u>Output variable</u> | <u>Output type</u> | <u>Description</u>                                                                                                                                                                                                                                                                                                                                                                                                                                                                      |
|------------------------|--------------------|-----------------------------------------------------------------------------------------------------------------------------------------------------------------------------------------------------------------------------------------------------------------------------------------------------------------------------------------------------------------------------------------------------------------------------------------------------------------------------------------|
| discdepth              | m by 1 matrix      | The mid-points of the discrete depth samples (in cm).                                                                                                                                                                                                                                                                                                                                                                                                                                   |
| Adiscagemed            | m by 1 matrix      | The Species A median true ages for the discrete depth samples (in years).                                                                                                                                                                                                                                                                                                                                                                                                               |
| Adiscagemean           | m by 1 matrix      | The Species A mean true ages for the discrete depth samples (in years).                                                                                                                                                                                                                                                                                                                                                                                                                 |
| AdiscAMSage            | m by 1 matrix      | The Species A laboratory <sup>14</sup> C ages for the discrete depth samples ( <sup>14</sup> C year).                                                                                                                                                                                                                                                                                                                                                                                   |
| AdiscAMSerr            | m by 1 matrix      | The Species A laboratory <sup>14</sup> C measurement errors for the discrete depth samples ( <sup>14</sup> C year).                                                                                                                                                                                                                                                                                                                                                                     |
| Adisc14Cage            | m by 1 matrix      | The Species A mean <sup>14</sup> C age for the discrete depth samples ( <sup>14</sup> C year).                                                                                                                                                                                                                                                                                                                                                                                          |
| Adiscscalagemed        | m by 1 matrix      | The Species A median calibrated <sup>14</sup> C age for the discrete depth sample (in cm).                                                                                                                                                                                                                                                                                                                                                                                              |
| Adiscblank             | m by 1 matrix      | The number of Species A <sup>14</sup> C-blank whole specimens contained within each discrete depth sample (n foraminifera).                                                                                                                                                                                                                                                                                                                                                             |
| Adiscwhole             | m by 1 matrix      | The cut off point for whole specimens for each discrete depth sample (specimens with bioturbation cycles less than this number are considered to be whole).                                                                                                                                                                                                                                                                                                                             |
| Adisc Carmean          | m by x matrix      | Species A mean carrier signals, whereby each column corresponds to a carrier signal, and columns correspond to discrete depth samples in discdepth.                                                                                                                                                                                                                                                                                                                                     |
| Adiscnforam            | m by 1 matrix      | Species A specimens picked for the discrete depth sample (n specimens). Should usually correspond to input value <i>Apickfordate</i> , unless there were not enough whole specimens available to pick to meet the minimum specified by the minimum sample size <i>Apickfordate</i> , in such case zero specimens will be picked. If <i>Apickfordate</i> is set at -1, <i>Adiscnforam</i> corresponds to the total amount of Species A whole specimens within the discrete depth sample. |
| Bdiscagemed            | m by 1 matrix      | As for Adiscagemed, but for Species B.                                                                                                                                                                                                                                                                                                                                                                                                                                                  |
| Bdiscagemean           | m by 1 matrix      | As for Adiscagemean, but for Species B.                                                                                                                                                                                                                                                                                                                                                                                                                                                 |
| BdiscAMSage            | m by 1 matrix      | As for AdiscAMSage, but for Species B.                                                                                                                                                                                                                                                                                                                                                                                                                                                  |
| BdiscAMSerr            | m by 1 matrix      | As for AdiscAMSerr, but for Species B.                                                                                                                                                                                                                                                                                                                                                                                                                                                  |
| Bdisc14Cage            | m by 1 matrix      | As for Adisc14Cage, but for Species B.                                                                                                                                                                                                                                                                                                                                                                                                                                                  |
| Bdiscscalagemed        | m by 1 matrix      | As for Adiscscalagemed, but for Species B.                                                                                                                                                                                                                                                                                                                                                                                                                                              |
| Bdiscblank             | m by 1 matrix      | As for Adiscblank, but for Species B.                                                                                                                                                                                                                                                                                                                                                                                                                                                   |
| Bdiscwhole             | m by 1 matrix      | As for Adiscwhole, but for Species B.                                                                                                                                                                                                                                                                                                                                                                                                                                                   |
| Bdisc Carmean          | m by x matrix      | As for Adisc Carmean, but for Species B.                                                                                                                                                                                                                                                                                                                                                                                                                                                |
| Bdiscnforam            | m by 1 matrix      | As for Adiscnforam, but for Species B.                                                                                                                                                                                                                                                                                                                                                                                                                                                  |
